# Supplementary material for: Translaminar recurrence from layer 5 suppresses superficial cortical layers
Source: PubMed Central journal article supplement (PMC9095870; doi:10.1038/s41467-022-30349-w), 2022-05-11
Supplement: 41467_2022_30349_MOESM3_ESM.pdf [file 41467_2022_30349_MOESM3_ESM.pdf]

**File name: Supplementary Data 1**

**Description: Summary of statistics used in all figures.**

Number of replications, statistical test, and p value are listed for each experiment in all figures and supplementary figures.
